# Supplementary material for: Molecular mechanisms of synergistic action of Ramucirumab and Paclitaxel in Gastric Cancers cell lines
Source: PubMed Central journal article supplement (PMC7188894; doi:10.1038/s41598-020-64195-x), 2020-04-28
Supplement: 41598_2020_64195_MOESM1_ESM.pdf [file 41598_2020_64195_MOESM1_ESM.pdf]

# Molecular mechanisms of synergistic action of Ramucirumab and Paclitaxel in Gastric Cancers cell lines

Maria Grazia Refolo<sup>1</sup>, Claudio Lotesoriere<sup>2</sup>, Ivan Roberto Lolli<sup>2</sup>, Caterina Messa<sup>1\*</sup> and Rosalba D'Alessandro<sup>1\*</sup>

<sup>1</sup> Laboratory of Cellular and Molecular Biology, Department of Clinical Pathology, National Institute of Gastroenterology, "Saverio de Bellis" Research Hospital, Castellana Grotte 70013, BA, Italy; maria.refolo@irccsdebellis.it; caterina.messa@irccsdebellis.it; rosalba.dalessandro@irccsdebellis.it; <sup>2</sup> Medical Oncology Unit, National Institute of Gastroenterology, "Saverio de Bellis" Research Hospital, Castellana Grotte 70013; claudio.lotesoriere@irccsdebellis.it; ivan.lolli@irccsdebellis.it;

\* Correspondence:

[caterina.messa@irccsdebellis.it](mailto:caterina.messa@irccsdebellis.it);

[rosalba.dalessandro@irccsdebellis.it](mailto:rosalba.dalessandro@irccsdebellis.it)

Tel.: +39 0804994178;

Laboratory of Cellular and Molecular Biology, Department of Clinical Pathology, National Institute of Gastroenterology, "Saverio de Bellis" Research Hospital, Castellana Grotte 70013, BA, Italy;

## Supplementary Material

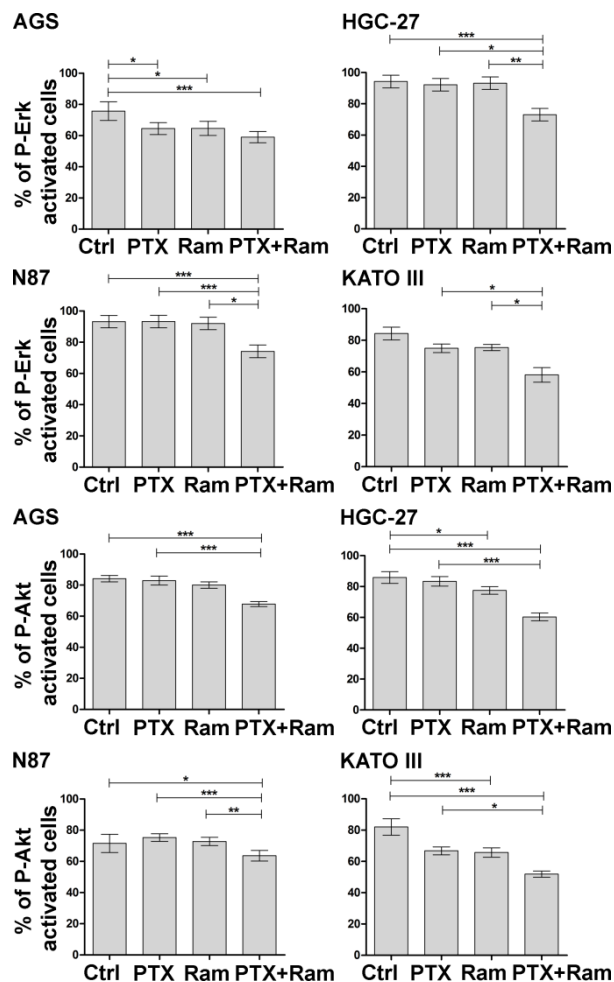

**Fig. S1 Ramucirumab and/or Paclitaxel treatment affect MAPK and PI3K/Akt signaling in gastric cancer cell lines.** The Muse Activation Kits were used to evaluate the ERK and Akt phosphorylation relative to the total protein expression after 15 min and 24 h respectively in AGS, HGC-27, NCI-N87 [N87] and KATO III cells. Data relative to three independent experiments, expressed as mean  $\pm$  SD, were plotted in the graphs. \*p<0.05; \*\*p<0.001; \*\*\*p<0.0001
